# Supplementary material for: Noise-Induced Frequency Modifications of Tamarin Vocalizations: Implications for Noise Compensation in Nonhuman Primates
Source: PubMed Central journal article supplement (PMC4479599; doi:10.1371/journal.pone.0130211), 2015-06-24
Supplement: pone.0130211.s006.pdf [file pone.0130211.s006.pdf]

Raw Data

Treatment Period Whole CLCs – Averaged for each trial

| Animal | Treatment type | Bandwidth | Trial Type | Noise Level (dB) | Vocalization level (dB) | Minimum Frequency [Hz] | Peak Frequency [Hz] | Duration [s] | F3       |
|--------|----------------|-----------|------------|------------------|-------------------------|------------------------|---------------------|--------------|----------|
| Bart   | A              | 5         | ctrl       | 42.55            | 54.02                   | 1482.04                | 5554.68             | 1.49         | 0.648705 |
| Bart   | A              | 5         | trt        | 64.90            | 64.13                   | 1388.50                | 3489.86             | 2.27         | 3.722626 |
| Bart   | B              | 5         | ctrl       | 42.44            | 59.29                   | 1271.30                | 2584.00             | 2.17         | 0.625723 |
| Bart   | B              | 5         | trt        | 54.87            | 59.57                   | 1387.27                | 4605.43             | 1.97         | 1.35179  |
| Bart   | C              | 5         | ctrl       | 42.42            | 63.73                   | 1360.63                | 3410.15             | 2.47         | 3.10062  |
| Bart   | C              | 5         | trt        | 46.88            | 64.32                   | 1370.13                | 3640.63             | 2.41         | 2.400488 |
| Bart   | D              | 10        | ctrl       | 42.62            | 56.52                   | 1520.70                | 1795.88             | 1.95         | 1.906208 |
| Bart   | D              | 10        | trt        | 59.17            | 67.06                   | 1382.26                | 4424.66             | 1.87         | 2.014575 |
| Bart   | E              | 10        | ctrl       | 42.38            | 60.11                   | 1478.50                | 7968.80             | 1.87         | 1.92094  |
| Bart   | E              | 10        | trt        | 50.11            | 68.07                   | 1440.88                | 4167.18             | 2.02         | 1.64278  |
| Bart   | F              | 10        | ctrl       | 42.20            | 56.55                   | 1403.48                | 4330.08             | 1.76         | 0.33797  |
| Bart   | F              | 10        | trt        | 43.99            | 64.55                   | 1294.20                | 3353.94             | 2.48         | 1.922318 |
| Jerry  | A              | 5         | ctrl       | 42.43            | 41.28                   | 1497.30                | 2441.43             | 1.43         | 0        |
| Jerry  | A              | 5         | trt        | 64.70            | 59.98                   | 1514.20                | 4544.90             | 1.97         | 0.954685 |
| Jerry  | B              | 5         | ctrl       | 42.19            | 54.40                   | 1496.15                | 5578.15             | 1.87         | 0.514398 |
| Jerry  | B              | 5         | trt        | 54.61            | 55.96                   | 1367.93                | 5554.70             | 2.02         | 2.053367 |
| Jerry  | C              | 5         | ctrl       | 42.77            | 44.59                   | 1542.80                | 1757.85             | 1.79         | 0        |
| Jerry  | C              | 5         | trt        | 46.34            | 54.22                   | 1435.63                | 1760.75             | 1.93         | 0.427634 |

|       |   |    |      |       |       |         |         |      |          |
|-------|---|----|------|-------|-------|---------|---------|------|----------|
| Jerry | D | 10 | ctrl | 42.63 | 45.89 | 1620.23 | 1929.70 | 1.89 | 0.008509 |
| Jerry | D | 10 | trt  | 59.37 | 71.08 | 1282.24 | 4134.38 | 2.38 | 3.683993 |
| Jerry | E | 10 | ctrl | 42.42 | 54.94 | 1414.23 | 2727.55 | 2.07 | 0.81249  |
| Jerry | E | 10 | trt  | 49.77 | 58.38 | 1307.08 | 3638.65 | 2.05 | 1.672393 |
| Jerry | F | 10 | ctrl | 42.35 | 46.65 | 1649.90 | 2381.83 | 1.65 | 0.020624 |
| Jerry | F | 10 | trt  | 44.20 | 63.85 | 1389.71 | 3664.63 | 2.20 | 1.547304 |
| Mulva | A | 5  | ctrl | 42.64 | 62.63 | 1550.49 | 2835.94 | 2.07 | 0.65556  |
| Mulva | A | 5  | trt  | 64.10 | 74.07 | 1557.36 | 5756.26 | 2.57 | 2.373367 |
| Mulva | B | 5  | ctrl | 42.56 | 64.75 | 1639.20 | 3975.58 | 2.05 | 0.810855 |
| Mulva | B | 5  | trt  | 55.03 | 72.04 | 1468.99 | 4022.59 | 2.23 | 2.835574 |
| Mulva | C | 5  | ctrl | 42.21 | 64.83 | 1371.37 | 4187.50 | 2.45 | 2.681575 |
| Mulva | C | 5  | trt  | 46.97 | 68.85 | 1525.64 | 4610.14 | 2.63 | 3.69032  |
| Mulva | D | 10 | ctrl | 42.31 | 67.71 | 1589.76 | 5238.30 | 2.88 | 1.240973 |
| Mulva | D | 10 | trt  | 59.01 | 75.92 | 1456.06 | 6832.04 | 2.54 | 3.861944 |
| Mulva | E | 10 | ctrl | 42.24 | 66.42 | 1614.20 | 4222.67 | 2.17 | 1.798512 |
| Mulva | E | 10 | trt  | 50.57 | 73.21 | 1532.05 | 5487.30 | 2.34 | 4.307936 |
| Mulva | F | 10 | ctrl | 42.65 | 66.35 | 1526.70 | 4103.01 | 2.47 | 1.249667 |
| Mulva | F | 10 | trt  | 44.19 | 66.54 | 1592.78 | 3568.35 | 1.96 | 0.73885  |

Treatment Period CLC fundamental frequencies

| Animal | Treatment type | Bandwidth [kHz] | Trial type | Noise level [dB] | Vocalization level [dB] | Minimum frequency [Hz] | Peak Frequency [Hz] | Duration [s] |
|--------|----------------|-----------------|------------|------------------|-------------------------|------------------------|---------------------|--------------|
| Bart   | A              | 5               | CTRL       | 42.6             | 51.4                    | 1511.273               | 1844.52             | 1.4856       |
| Bart   | A              | 5               | TRT        | 64.9             | 55.8                    | 1564.2                 | 1725.575            | 2.1755       |
| Bart   | B              | 5               | CTRL       | 42.4             | 56.8                    | 1392.962               | 1713.875            | 2.16775      |
| Bart   | B              | 5               | TRT        | 54.9             | 54.7                    | 1507                   | 1726.6              | 1.966667     |
| Bart   | C              | 5               | CTRL       | 42.4             | 62.2                    | 1422.77                | 1722.675            | 2.46575      |
| Bart   | C              | 5               | TRT        | 46.9             | 62.6                    | 1499.425               | 1761.733            | 2.413333     |
| Bart   | D              | 10              | CTRL       | 42.6             | 54.6                    | 1553.492               | 1795.875            | 1.95225      |
| Bart   | D              | 10              | TRT        | 59.2             | 63.2                    | 1496.908               | 1764.5              | 1.868714     |
| Bart   | E              | 10              | CTRL       | 42.4             | 58.9                    | 1568.48                | 1763.65             | 1.8655       |
| Bart   | E              | 10              | TRT        | 50.1             | 66.7                    | 1557.047               | 1828.14             | 2.0214       |
| Bart   | F              | 10              | CTRL       | 42.2             | 52.7                    | 1478.49                | 1716.8              | 1.76275      |
| Bart   | F              | 10              | TRT        | 44.0             | 63.3                    | 1409.176               | 1741.4              | 2.483        |
| Jerry  | A              | 5               | CTRL       | 42.4             | 32.6                    | 1579.16                | 1820.333            | 1.425        |
| Jerry  | A              | 5               | TRT        | 64.7             | 48.4                    | 2508.033               | 1898.433            | 1.973        |
| Jerry  | B              | 5               | CTRL       | 42.2             | 51.9                    | 1487.6                 | 1798.85             | 1.8735       |
| Jerry  | B              | 5               | TRT        | 54.6             | 49.1                    | 1496.145               | 1760.725            | 2.0225       |
| Jerry  | C              | 5               | CTRL       | 42.8             | 38.1                    | 1535.633               | 1757.85             | 1.7905       |
| Jerry  | C              | 5               | TRT        | 46.3             | 50.5                    | 1505.269               | 1760.75             | 1.93275      |
| Jerry  | D              | 10              | CTRL       | 42.3             | 40.3                    | 1653.245               | 1929.7              | 1.89         |
| Jerry  | D              | 10              | TRT        | 59.4             | 69.4                    | 1417.717               | 2191.42             | 2.3784       |
| Jerry  | E              | 10              | CTRL       | 42.4             | 52.7                    | 1489.225               | 1784.175            | 2.066        |
| Jerry  | E              | 10              | TRT        | 49.8             | 55.1                    | 1443.9                 | 1784.2              | 2.04675      |
| Jerry  | F              | 10              | CTRL       | 42.3             | 41.4                    | 1692.76                | 1918.95             | 1.6485       |
| Jerry  | F              | 10              | TRT        | 44.2             | 61.8                    | 1544.643               | 1985.486            | 2.197429     |
| Mulva  | A              | 5               | CTRL       | 42.6             | 61.4                    | 1653.42                | 1966.8              | 2.1865       |
| Mulva  | A              | 5               | TRT        | 64.1             | 70.7                    | 1760.833               | 1957.05             | 2.332        |

|       |   |    |      |      |      |          |          |          |
|-------|---|----|------|------|------|----------|----------|----------|
| Mulva | B | 5  | CTRL | 42.6 | 63.9 | 1715.773 | 2053.7   | 2.0545   |
| Mulva | B | 5  | TRT  | 49.6 | 64.6 | 1656.474 | 1998.033 | 2.567333 |
| Mulva | C | 5  | CTRL | 42.2 | 64.0 | 1564.2   | 1843.767 | 2.453333 |
| Mulva | C | 5  | TRT  | 47.0 | 67.9 | 1631.333 | 1999.24  | 2.629    |
| Mulva | D | 10 | CTRL | 42.3 | 67.0 | 1673.527 | 2010.92  | 2.8778   |
| Mulva | D | 10 | TRT  | 59.0 | 74.3 | 1617.775 | 2055.46  | 2.5446   |
| Mulva | E | 10 | CTRL | 42.2 | 65.6 | 1671.341 | 1916.017 | 2.1725   |
| Mulva | E | 10 | TRT  | 50.6 | 71.5 | 1597.318 | 2024.4   | 2.3355   |
| Mulva | F | 10 | CTRL | 42.7 | 65.6 | 1648.508 | 1942.4   | 2.470125 |
| Mulva | F | 10 | TRT  | 44.2 | 65.7 | 1659.1   | 1978.517 | 1.964833 |

Treatment Period Chirps – Averaged for each trial

| Animal | Treatment Type | Bandwidth | Trial Type | Noise Level [dB] | Vocalization level [dB] | Minimum frequency [Hz] | Maximum Frequency [Hz] | Peak Frequency [Hz] | Start Frequency [Hz] | Duration [s] | F2       |
|--------|----------------|-----------|------------|------------------|-------------------------|------------------------|------------------------|---------------------|----------------------|--------------|----------|
| MLHS   | A              | 5         | ctrl       | 42.12            | 66.62                   | 6685.22                | 10101.71               | 9701.59             | 8852.61              | 0.058105     | 0.638997 |
| MLHS   | A              | 5         | trt        | 64.11            | 69.52                   | 7060.23                | 10446.87               | 10136.71            | 8988.13              | 0.061133     | 0.568513 |
| MLHS   | B              | 5         | ctrl       | 42.45            | 65.28                   | 7310.77                | 10143.98               | 9903.01             | 9245.08              | 0.058111     | 0.657197 |
| MLHS   | B              | 5         | trt        | 55.17            | 67.34                   | 7205.63                | 10330.29               | 10109.37            | 9409.26              | 0.059519     | 1.132152 |
| MLHS   | C              | 5         | ctrl       | 42.79            | 65.14                   | 7625.80                | 10622.17               | 10323.83            | 9669.74              | 0.061655     | 0.57625  |
| MLHS   | C              | 5         | trt        | 46.49            | 67.14                   | 7022.45                | 10070.68               | 9677.55             | 8941.79              | 0.058788     | 0.988612 |
| MLHS   | D              | 10        | ctrl       | 42.30            | 65.30                   | 7042.98                | 10271.42               | 9963.45             | 9180.88              | 0.063667     | 0.769276 |
| MLHS   | D              | 10        | trt        | 58.81            | 68.49                   | 7452.57                | 10522.46               | 10246.21            | 9369.06              | 0.065656     | 0.389831 |
| MLHS   | E              | 10        | ctrl       | 42.74            | 66.16                   | 7542.02                | 10244.00               | 9981.32             | 9460.78              | 0.064783     | 1.023865 |
| MLHS   | E              | 10        | trt        | 55.08            | 67.64                   | 7698.34                | 10466.91               | 10228.04            | 9512.76              | 0.076345     | 0.417996 |
| MLHS   | F              | 10        | ctrl       | 42.18            | 65.17                   | 7220.05                | 10133.96               | 9840.95             | 9055.67              | 0.0535       | 0.413898 |
| MLHS   | F              | 10        | trt        | 44.09            | 64.61                   | 7494.96                | 10255.68               | 9999.13             | 9192.44              | 0.064852     | 0.411544 |
| SUS    | A              | 5         | ctrl       | 42.63            | 60.26                   | 7642.67                | 10062.14               | 9711.73             | 9591.80              | 0.064        | 0.30546  |
| SUS    | A              | 5         | trt        | 63.83            | 66.36                   | 7873.71                | 10837.04               | 10535.13            | 10445.14             | 0.076286     | 0.259267 |
| SUS    | B              | 5         | ctrl       | 42.39            | 69.69                   | 7022.30                | 10877.36               | 10634.35            | 9753.93              | 0.069        | 0.454749 |
| SUS    | B              | 5         | trt        | 55.34            | 63.28                   | 7971.23                | 10951.65               | 10658.56            | 10061.70             | 0.059926     | 0.202456 |
| SUS    | C              | 5         | ctrl       | 42.25            | 63.49                   | 7496.13                | 10243.70               | 9878.90             | 9638.71              | 0.058667     | 0.678371 |
| SUS    | C              | 5         | trt        | 46.64            | 66.83                   | 7298.86                | 10598.01               | 10345.31            | 9743.40              | 0.0601       | 0.80523  |
| SUS    | D              | 10        | ctrl       | 42.60            | 63.98                   | 7490.01                | 10391.28               | 10159.04            | 9656.43              | 0.06081      | 0.550048 |
| SUS    | D              | 10        | trt        | 59.47            | 66.06                   | 8131.29                | 10977.29               | 10739.89            | 10259.12             | 0.067412     | 0.278306 |
| SUS    | E              | 10        | ctrl       | 42.15            | 66.91                   | 6976.52                | 10547.31               | 10249.46            | 9474.34              | 0.059        | 0.650069 |
| SUS    | E              | 10        | trt        | 49.75            | 65.40                   | 7702.12                | 10622.85               | 10375.59            | 9746.38              | 0.065        | 0.295092 |
| SUS    | F              | 10        | ctrl       | 42.28            | 64.62                   | 7141.46                | 10232.81               | 9940.43             | 9436.88              | 0.052292     | 0.850069 |
| SUS    | F              | 10        | trt        | 44.00            | 66.36                   | 7559.16                | 10322.10               | 10138.40            | 9883.00              | 0.074857     | 0.2821   |
| BART   | B              | 5         | ctrl       | 42.44            | 65.47                   | 8033.92                | 10588.27               | 10279.03            | 9697.43              | 0.055143     | 0.370543 |
| BART   | B              | 5         | trt        | 54.87            | 68.23                   | 8669.13                | 11734.74               | 11493.50            | 10584.56             | 0.064222     | 0.188267 |

|      |   |    |      |       |       |         |          |          |          |          |          |
|------|---|----|------|-------|-------|---------|----------|----------|----------|----------|----------|
| BART | C | 5  | ctrl | 42.42 | 67.61 | 8907.79 | 11620.56 | 11321.62 | 10634.78 | 0.052556 | 0.350722 |
| BART | C | 5  | trt  | 46.88 | 69.01 | 8655.95 | 11712.77 | 11398.84 | 10544.70 | 0.0542   | 0.01011  |
| BART | D | 10 | ctrl | 42.62 | 68.38 | 8710.66 | 11665.67 | 11349.38 | 10639.16 | 0.05296  | 0.297496 |
| BART | D | 10 | trt  | 59.17 | 70.73 | 8577.82 | 11379.66 | 11044.43 | 10175.54 | 0.058667 | 0.307579 |
| BART | E | 10 | ctrl | 42.38 | 69.87 | 9371.06 | 12083.39 | 11732.54 | 11041.53 | 0.054059 | 0.176453 |
| BART | E | 10 | trt  | 50.11 | 73.98 | 8341.35 | 11647.96 | 11286.39 | 10614.58 | 0.059316 | 0.311495 |
